# Supplementary material for: Microstructural Characterization and Magnetic, Dielectric, and Transport Properties of Hydrothermal La2FeCrO6 Double Perovskites
Source: MDPI journal article supplement (doi:10.3390/nano13243132), 2023-12-13
Supplement: s1 [file s1]

# Microstructural Characterization and Magnetic, Dielectric, and Transport Properties of Hydrothermal $\text{La}_2\text{FeCrO}_6$ Double Perovskites

## Section S1-Theoretical $M_S$ value of the LFCO powders and their ASD content determination

To assess the theoretical  $M_S$  value of the LFCO powders based on an intuitive ionic model, one should take into account of the different oxide states of Fe and Cr ions and their relative amount ratios, as revealed by the XPS spectra. Here, the molar percentage ratios of  $[\text{Fe}^{2+}]/[\text{Fe}^{3+}]$  and  $[\text{Cr}^{3+}]/[\text{Cr}^{4+}]$  were 18%:82% and 74%:26%, respectively. The  $M_S$  value of the LFCO powders is evaluated based on the following Equations (S1-S2) and the electronic configurations of  $\text{Fe}^{2+}$  ( $3d^6, t_{2g}^4 e_g^2; \mu_{\text{Fe}^{2+}} = 4.90 \mu_B$ ),  $\text{Fe}^{3+}$  ( $3d^5, t_{2g}^3 e_g^2; \mu_{\text{Fe}^{3+}} = 5.92 \mu_B$ ),  $\text{Cr}^{3+}$  ( $3d^3, t_{2g}^3 e_g^0; \mu_{\text{Cr}^{3+}} = 3.87 \mu_B$ ), and  $\text{Cr}^{4+}$  ions ( $3d^2, t_{2g}^2 e_g^0; \mu_{\text{Cr}^{4+}} = 2.83 \mu_B$ ). In addition, the AFM coupling between the Fe and Cr ions is considered and the molar ratio of Fe:Cr is 1:1 at the B-sites. Thus,

$$\langle m_{\text{Fe}} \rangle = 4.90 \times 18\% + 5.92 \times 82\% = 5.74 \mu_B/\text{f.u.} \quad (\text{S1})$$

$$\langle m_{\text{Cr}} \rangle = 3.87 \times 74\% + 2.83 \times 26\% = 3.60 \mu_B/\text{f.u.} \quad (\text{S2})$$

$$M_S = \langle m_{\text{Fe}} \rangle - \langle m_{\text{Cr}} \rangle = 2.14 \mu_B/\text{f.u.} \quad (\text{S3})$$

In comparison with the above theoretical  $M_S$  ( $= 2.14 \mu_B/\text{f.u.}$ ), the experimental  $M_S = 0.31 \mu_B/\text{f.u.}$  at 5 K, is much smaller due to the existence of large amounts of ASDs in the LFCO powders. The ASD content in the LFCO powders can be assessed by Equation (S4) [63]:

$$\text{ASD} = \frac{(1 - \frac{M_S^{\text{exp}}}{M_S^{\text{cal}}})}{2} \quad (\text{S4})$$

where  $M_S^{\text{cal}}$  is the theoretical  $M_S$  value, and  $M_S^{\text{exp}}$  the experimental one. The ASD content was calculated to 42.8%, which reflected that the B-site ordering degree ( $\eta$ ) of the LFCO powders was much smaller (14.4%), as described by Equation (S5) [64]:

$$\eta = 1 - 2 \times \text{ASD} \quad (\text{S5})$$

## Section S2- Effective magnetic moments ( $\mu_{\text{eff}}$ ) and theoretical magnetic moment ( $\mu_{\text{cal}}$ )

By using the CW parameter  $C$  the effective magnetic moments ( $\mu_{\text{eff}}$ ) in the PM phase can be calculated as 6.64  $\mu_B/\text{f.u.}$  (@ 500 Oe) by the following Equation (S6) [65]:

$$\mu_{\text{eff}} = \sqrt{\frac{3k_B C}{N_A \mu_B^2}} = 2.828 \sqrt{C} \quad (\text{S6})$$

As compared with the  $\mu_{\text{eff}}$ , the theoretical magnetic moment,  $\mu_{\text{cal}}$  (per formula unit) of the  $\text{La}_2\text{Fe}_{0.18}^{2+}\text{Fe}_{0.82}^{3+}\text{Cr}_{0.74}^{3+}\text{Cr}_{0.26}^{4+}\text{O}_6$  is determined to be 6.80  $\mu_B/\text{f.u.}$  by using Equation (S7) [66]:

$$\mu_{\text{cal}} = \sqrt{0.18 \times \mu_{\text{Fe}^{2+}}^2 + 0.82 \times \mu_{\text{Fe}^{3+}}^2 + 0.74 \times \mu_{\text{Cr}^{3+}}^2 + 0.26 \times \mu_{\text{Cr}^{4+}}^2} \quad (\text{S7})$$

where the effective magnetic moments for the  $\text{Fe}^{2+}$  ( $\mu_{\text{Fe}^{2+}} = 4.90 \mu_B$ ),  $\text{Fe}^{3+}$  ( $\mu_{\text{Fe}^{3+}} = 5.92 \mu_B$ ),  $\text{Cr}^{3+}$  ( $\mu_{\text{Cr}^{3+}} = 3.87 \mu_B$ ), and  $\text{Cr}^{4+}$  ( $\mu_{\text{Cr}^{4+}} = 2.83 \mu_B$ ) ions are used [67].



**Table S2** Species, peak positions and percentage molar ratios obtained from the peak fittings of Fe 2p<sub>3/2</sub>, Cr 2p<sub>3/2</sub> and O 1s XPS spectra of the hydrothermal LFCO powders and the effective oxidation states of the Fe and Cr elements.

| XPS results                                  |                      | Hydrothermal LFCO powders |                    |                                                   |
|----------------------------------------------|----------------------|---------------------------|--------------------|---------------------------------------------------|
|                                              |                      | Species                   | Position (eV)      | Percentage molar ratio                            |
| XPS spectra                                  | Fe 2p <sub>3/2</sub> | Fe <sup>2+</sup>          | 710.15             | [Fe <sup>2+</sup> ]/[Fe <sup>3+</sup> ] = 18%:82% |
|                                              |                      | Fe <sup>3+</sup>          | 711.41             |                                                   |
|                                              | Cr 2p <sub>3/2</sub> | Species                   | Position           | Percentage molar ratio                            |
|                                              |                      | Cr <sup>3+</sup>          | 576.25             | [Cr <sup>3+</sup> ]:[Cr <sup>4+</sup> ] = 74%:26% |
|                                              |                      | Cr <sup>4+</sup>          | 578.90             |                                                   |
|                                              | O 1s                 | Species                   | Position           | Percentage molar ratio                            |
|                                              |                      | O <sub>α</sub>            | 529.42             | [O <sub>α</sub> ]:[O <sub>β</sub> ] = 46%: 54%    |
|                                              |                      | O <sub>β</sub>            | 531.70             |                                                   |
| Effective oxide states of Fe and Cr elements |                      |                           | Fe element: + 2.82 |                                                   |
|                                              |                      |                           | Cr element: + 3.26 |                                                   |

**References**

63. Pal, S.; Govinda, S.; Goyal, M.; Mukherjee, S.; Pal, B.; Saha, R.; Sundaresan, A.; Jana, S.; Karis, O.; Freeland, J.W.; et al. Effect of anti-site disorder on magnetism in La<sub>2</sub>NiMnO<sub>6</sub>. *Phys. Rev. B* **2018**, *97*, 165137.

64. Moritomo, Y.; Shimamoto, N.; Xu, S.; Machida, A.; Nishibori, E.; Takata, M.; Sakata, M.; Nakamura, A. Effects of B-site disorder in Sr<sub>2</sub>FeMoO<sub>6</sub> with double perovskite structure. *J. Appl. Phys.* **2001**, *40*, L672–L674.

65. Rogado, N.S.; Li, J.; Sleight, A.W.; Subramanian, M.A. Magnetocapacitance and magnetoresistance near room temperature in a ferromagnetic semiconductor: La<sub>2</sub>NiMnO<sub>6</sub>. *Adv. Mater.* **2005**, *17*, 2225–2227.

66. Taguchi, H. Relationship between crystal structure and electrical properties of Nd(Cr<sub>1-x</sub>Fe<sub>x</sub>)O<sub>3</sub>. *J. Solid State Chem.* **1997**, *131*, 108–114.

67. Buschow, K.H.J.; Boer, F.R. *Physics of Magnetism and Magnetic Materials*; Springer: Berlin/Heidelberg, Germany, 2003.
